# Supplementary material for: Rutile-TiO2 decorated Li4Ti5O12 nanosheet arrays with 3D interconnected architecture as anodes for high performance hybrid supercapacitors
Source: Royal Society of Chemistry journal article supplement (doi:10.1039/c5ta07666h), 2015-01-01
Supplement: c5ta07666h1.pdf [file c5ta07666h1.pdf]

## Electronic Supplementary Information (ESI)

### Rutile-TiO<sub>2</sub> Decorated Li<sub>4</sub>Ti<sub>5</sub>O<sub>12</sub> Nanosheet Arrays with 3D Interconnected Architecture as Anode for High Performance Hybrid Supercapacitor

Lin Gao, Dekang Huang, Yan Shen, Mingkui Wang\*

Wuhan National Laboratory for Optoelectronics, Huazhong University of Science and Technology,  
Luoyu Road 1037, Wuhan 430074, P. R. China.

E-mail: [mingkui.wang@mail.hust.edu.cn](mailto:mingkui.wang@mail.hust.edu.cn)

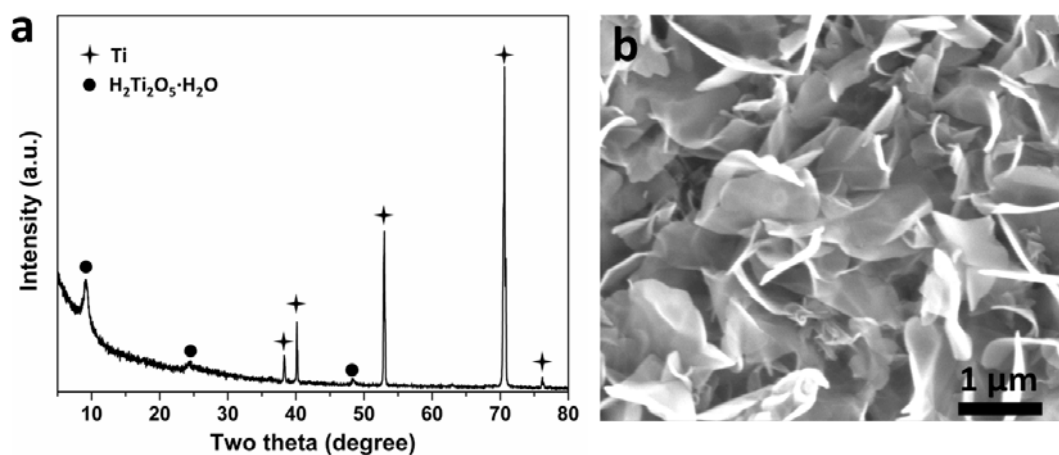

**Figure S1.** (a) XRD pattern and (b) SEM image for as-prepared TiO<sub>2</sub> nanosheet arrays without calcination.

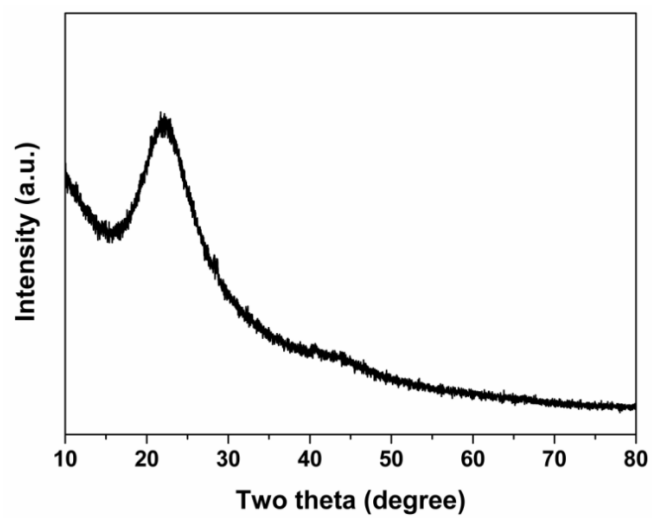

**Figure S2.** XRD pattern for N-CNTs.

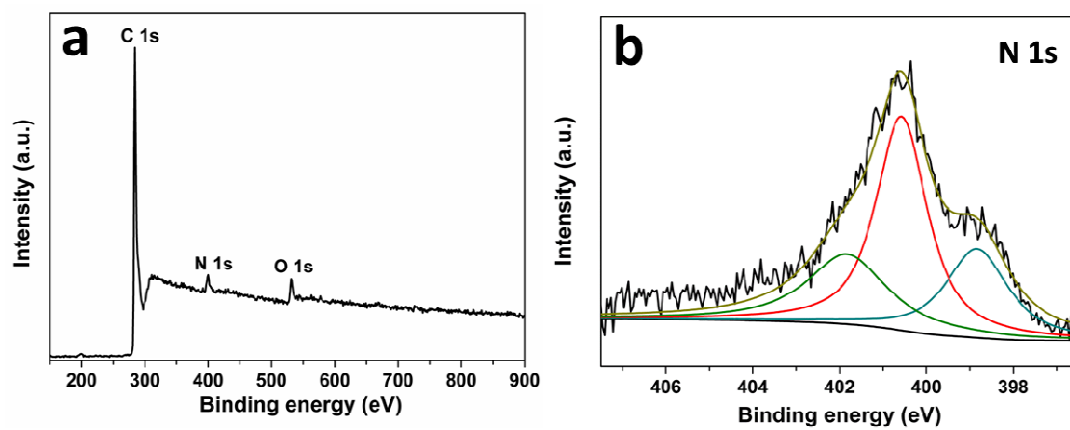

**Figure S3.** (a) XPS pattern of N-CNTs and (b) high-resolution XPS spectrum of N1s of N-CNTs.

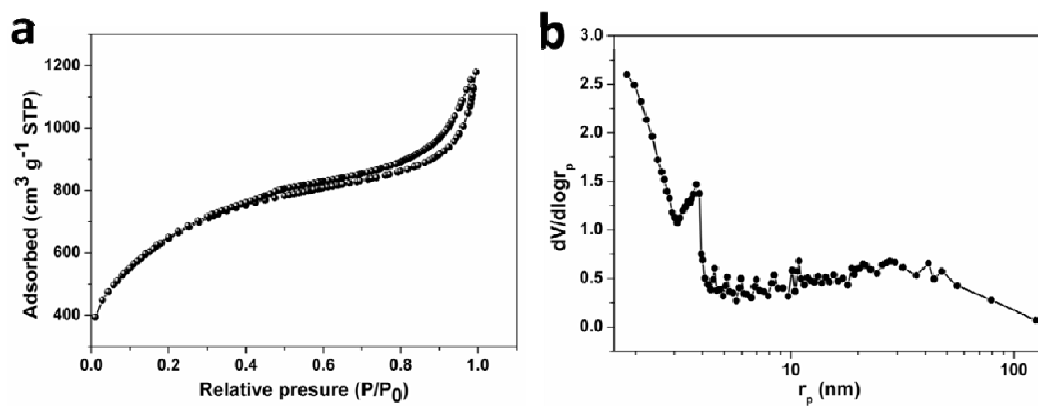

**Figure S4.** N<sub>2</sub> absorption and desorption of the N-CNTs samples

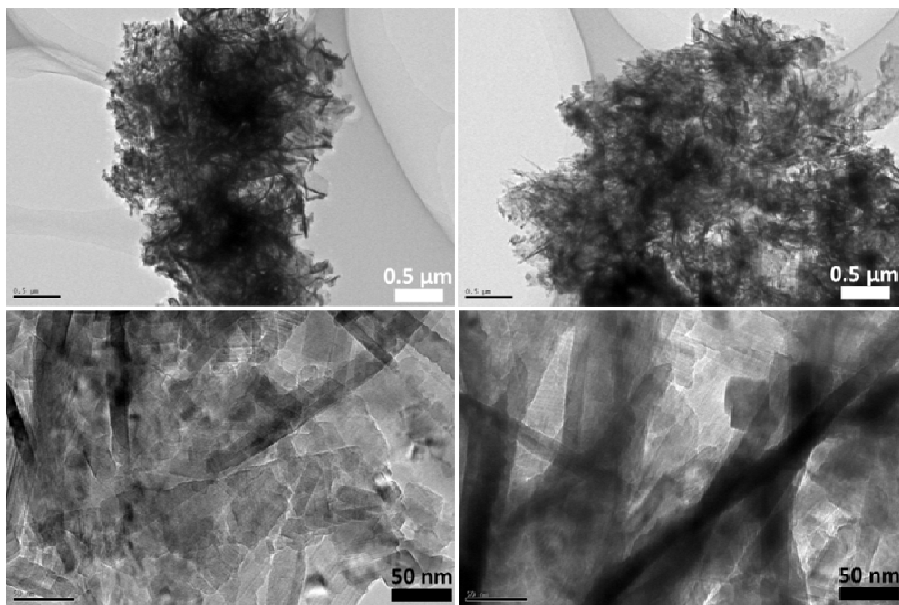

**Figure S5.** TEM images of the RLTO nanosheet arrays

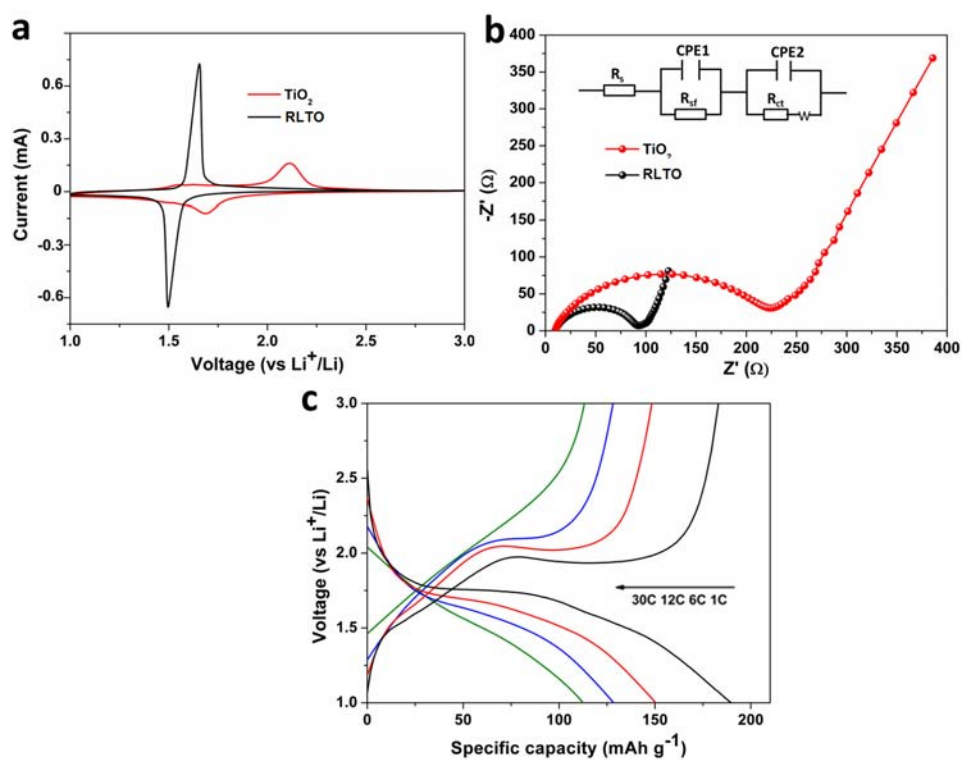

**Figure S6.**(a) CV curves of RLTO and  $\text{TiO}_2$  electrodes at a scan rate of  $0.5 \text{ mV s}^{-1}$  and (b) Nyquist plots of RLTO and  $\text{TiO}_2$  electrode (the inset is the equivalent circuit). (c) The galvanostatic charge-discharge curves in the voltage window of 1~3 V at different current densities for the  $\text{TiO}_2$  electrode.

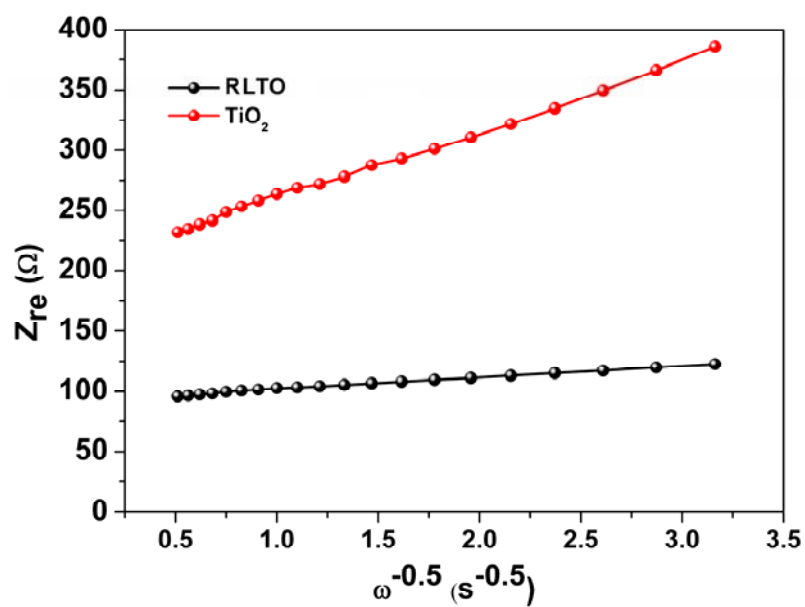

**Figure S7.** The relation between the real resistance and and corresponding low frequency for the RLTO and TiO<sub>2</sub> electrodes.

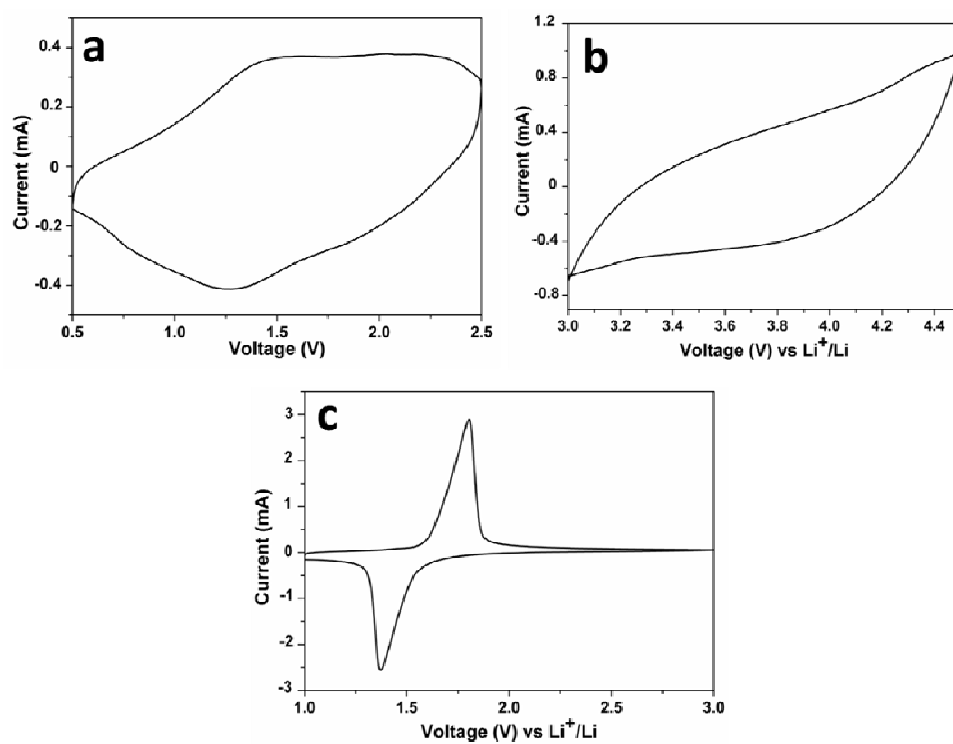

**Figure S8.** CV curves at a scan rate of  $5 \text{ mV s}^{-1}$  for (a) RLTO//N-CNTs LICs, (b) N-CNTs electrode and (c) RLTO electrode.
